# Supplementary material for: Behavior Rating Inventory of Executive Function in Preschool (Brief-P) and Attention-Deficit and Hyperactivity Disorders (ADHD): Systematic Review and Meta-Analysis of Floor and Ceiling Effects
Source: Preprints.org preprint supplement (doi:10.20944/preprints202310.2024.v1), 2023-10-31
Supplement: Supplementary file 1 [file supplementary]

Table 2. Characteristics of the studies included in the review.

| Number | Author/  Year/  Country | Design | Sample/n | Age  (Mean,SE) | IQ*  (Inteligence Quotient)  (Mean,SE) | Diagnostic instrument_ADHD | Assessment instrument for EF | Executive profile | Results |
| --- | --- | --- | --- | --- | --- | --- | --- | --- | --- |
| 1 | (Lacerda, y otros, 2020) Brazil | Causal Comparison: ADHD vs. Control | ADHD=24  Control=55 | ADHD= 5.58 (0.92) (years)  N-ADHD= 5.46 (0.72) (years) | ADHD=69.88(15.87)  N-ADHD= 76.64(17.20) | The Schedule for Affective Disorders and Schizophrenia for School Aged Children-Present and Lifetime Version  (K-SADS-PL) | >BRIEF-P  >Conners’ Kiddle Continious Perfomance Test (K-CPT 2) | Inhibition | Neuropsychological tasks and parent reports of executive functions (EF) may not be sensitive enough to differentiate preterm and/or underweight preschoolers with and without ADHD. |
| 2 | (Ezpeleta & Granero, 2015) Sapin | Causal Comparison:Control vs. ODD vs. ADHD vs. ODD+ADHD vs. Control | Control=538  ODD=51  ADHD=23  ODD+ADHD=10 | Control=3.76(0.33) (years)  ODD=3.87(0.30) (years)  ADHD=3.74(0.33) (years)  ODD+ADHD=3.69(0.31) (years) | Control=99.8(15.4)  ODD=98.0(16.4)  ADHD=91.9(21.0)  ODD+ADHD=88.5(16.6) | The Diagnostic Interview for Children and Adolescents for Parents of Preschool and Young Children (DICA-PPYC) | >BRIEF-P  >The Kiddie-Continuous Performance Test (K-CPT) | Clinical Scales and Indices (Global) | Executive functioning deficits assessed with a performance-based  with a performance-based measure or behavioral descriptions are specific to children with ADHD, compared to those with ODD. |
| 3 | (Zhang, y otros, 2018) China | Causal Comparison:  ADHD vs. Control | ADHD=163  Control=63 | ADHD=59.1(7.2) (months)  Control=59.7(5.3) (months) | ADHD=7(3)  Control=8(4)  *Matrices | Diagnostic Infant and Preschool Assessment (DIPA) | BRIEF-P | Clinical Scales and Indices (Global) | Combined assessment of performance-based neuropsychological testing and BRIEF-P in preschoolers with ADHD shows deficits in many areas. |
| 4 | (Skogan, y otros, 2015) Norway | Causal Comparison:  ADHD vs. ODD vs. Ansiedad vs. Control | ADHD=1134 | Total= 41.8(1.3) (months) | Global= 101.8(9.2) | The Preschool Age Psychiatric Assessment Interview (PAPA) | BRIEF-P | Inhibition  Working Memory | Early symptoms of ADHD were related to parent-reported difficulties primarily in inhibition and working memory.  Deficits in these two domains of EF characterize early forms of ADHD.  The clinical utility of the BRIEF-P as a measure of EF in preschoolers with ADHD symptoms is supported. |
| 5 | (Schneider, Ryan, & Mahone, 2020)  USA | Causal Comparison:  ADHD vs. Control | ADHD=49  Control=35 | ADHD= 5(0.6)  Control=  4.9(0.5) (years) | ADHD=108.4(11.6)  Control=109.7(13.2) | >Conners' Parent – and Teacher - Rating Scale Revises – Long Form (CPRS-R) (CTRS-R) | BRIEF-P | Inhibition  Flexibility  Emotional Control  Working Memory Planning/Organization | There are differences between evaluators on BRIEF-P.  Parents rated more symptoms than teachers. |
| 6 | (Perrin, Heller, & Loe, 2019)  USA | Causal Comparison:  ADHD vs. Control | ADHD=45  Control=48 | ADHD= 61(6.6) (months)  Control=58(6.2) (months) | ADHD= 98.6(16.4)  Control= 109.7(13.8) | >Child Behavior Checklist (CBCL) | BRIEF-P | Clinical Scales and Indices (Global) | Early identification of impairment in children with ADHD symptoms is recommended, along with specific intervention. |
| 7 | (Çak, Çengel, Gökler, Öktem, & Taşkıran, 2017)  Turkey | Causal Comparison:ADHD vs. Control | Control=52  ADHD=21 | Control=56.9(9.1) (months)  ADHD=58.1(8.3) (months) | Control=109.54(33.79  ADHD=98.13(19.45) | >The Kiddie-Schedule for Affective Disorders and Schizophrenia-Present and Lifetime versión (K-SADS-PL)  >The Conners' Parent Rating Scales – Revised / Short Form (CPRS-R/S) | BRIEF-P | Clinical Scales and Indices (Global) | Combined methods are suggested for a comprehensive assessment of preschoolers with inattentive and hyperactive/impulsive behavior. |

*IQ is Obtained with the application of the Wechsler intelligence scales.
